# Supplementary material
Source: publisher site journal article supplement (https://www.dovepress.com/article/259953)
Supplement: Supplementary file 1 [file get_supplementary_file.php]

| **Years** | **Adjusted a IR**  **(95% CI)** | **Adjusted b IR**  **(95% CI)** | **Adjusted c IR**  **(95% CI)** | **Adjusted d IR**  **(95% CI)** | **Adjusted e IR**  **(95% CI)** |
| --- | --- | --- | --- | --- | --- |
| April 2001 - March 2002 | 27.84(26.86, 28.83) | 32.08(31.00, 33.15) | 32.34(31.35, 33.33) | 37.49(36.35, 38.63) | 34.41(33.37, 35.44) |
| April 2002 - March 2003 | 31.38(30.26, 32.50) | 35.84(34.64, 37.04) | 35.28(34.24, 36.33) | 40.69(39.51, 41.88) | 36.74(35.69, 37.78) |
| April 2003 - March 2004 | 38.84(37.61, 40.06) | 44.63(43.32, 45.94) | 43.98(42.83, 45.12) | 51.07( 49.76, 52.37) | 46.06(44.91, 47.22) |
| April 2004 - March 2005 | 40.86(39.62, 42.09) | 46.96(45.63, 48.28) | 46.27(45.12, 47.43) | 53.69( 52.38, 55.01) | 48.48(47.31, 49.64) |
| April 2005 - March 2006 | 40.34(39.13, 41.54) | 46.59(45.29, 47.90) | 46.49(45.34, 47.63) | 54.02( 52.71, 55.33) | 49.13(47.97, 50.29) |
| April 2006 - March 2007 | 37.71(36.61, 38.82) | 43.90(42.68, 45.11) | 43.93(42.85, 45.01) | 51.44( 50.19, 52.69) | 46.90(45.79, 48.01) |
| April 2007 - March 2008 | 36.61(35.47, 37.75) | 42.34(41.11, 43.58) | 41.19(40.15, 42.23) | 48.07( 46.88, 49.25) | 42.99(41.96, 44.02) |
| April 2008 - March 2009 | 33.95(32.69, 35.20) | 38.82(37.49, 40.14) | 36.95(35.91, 37.99) | 42.83( 41.66, 44.00) | 37.45(36.49, 38.41) |
| April 2009 - March 2010 | 33.02 (31.74, 34.30) | 37.75(36.42, 39.09) | 35.34(34.31, 36.37) | 41.14( 39.99, 42.29) | 35.47(34.54, 36.40) |
| April 2010 - March 2011 | 41.23(39.78, 42.68) | 47.02(45.51, 48.54) | 43.53(42.39, 44.67) | 50.52( 49.25, 51.79) | 43.36(42.35, 44.37) |
| April 2011 - March 2012 | 49.51()47.94, 51.09 | 56.14(54.52, 57.77) | 51.85(50.62,53.09) | 59.92( 58.55, 61.29) | 51.22(50.13, 52.31) |
| April 2012 - March 2013 | 44.23(42.81, 45.66) | 50.69(49.20, 52.17) | 47.24(46.09, 48.39) | 55.14( 53.85, 56.43) | 47.43(46.39, 48.47) |
| April 2013 - March 2014 | 45.03(43.66, 46.41) | 51.75(50.31, 53.19) | 48.86(47.74, 49.99) | 56.98( 55.72, 58.24) | 49.73(48.70, 50.77) |
| April 2014 - March 2015 | 49.41(47.90, 50.92) | 56.37(54.81, 57.94) | 52.34(51.14, 53.53) | 60.77( 59.44, 62.10) | 52.37(51.30, 53.44) |
| April 2015 - March 2016 | 39.57(38.36, 40.79) | 45.77(44.50, 47.05) | 44.10(43.06, 45.14) | 51.68( 50.51, 52.85) | 45.62(44.64, 46.61) |

Appendix 1) Age, sex, and place of residence adjusted incidence rates (95% CI) of Ischemic Heart Disease (per 10000) based on CD-ICD-10 in Isfahan, Iran, during April 2001-March 2016

IR: Incidence Rate, CI: confidence Interval,

a: Age, sex and place of residence adjusted incidence rate (Iran population on census 2006 as reference population)

b: Age, sex and place of residence adjusted incidence rate (Iran population on census 2011 as reference population)

c: Age, sex and place of residence adjusted incidence rate (Isfahan province population on census 2006 as reference population)

d: Age, sex and place of residence adjusted incidence rate (Isfahan province population on census 2011 as reference population)

e: Age, sex and place of residence adjusted incidence rate (Isfahan district population during 2001-2016 as reference population)

| **Years** | **Adjusted1 IR**  **(95% CI)** | **Adjusted2 IR**  **(95% CI)** | **Adjusted3 IR**  **(95% CI)** | **Adjusted4 IR**  **(95% CI)** | **Adjusted5 IR**  **(95% CI)** |
| --- | --- | --- | --- | --- | --- |
| April 2001 - March 2002 | 11.77(11.17,12.37) | 13.67(13,14.34) | 14.16(13.51,14.8) | 16.48(15.73,17.23) | 15.37(14.68,16.07) |
| April 2002 - March 2003 | 14.19(13.47,14.9) | 16.31(15.54,17.08) | 16.5(15.8,17.2) | 19.1(18.3,19.91) | 17.56(16.83,18.28) |
| April 2003 - March 2004 | 17.48(16.69,18.27) | 20.11(19.26,20.96) | 20.21(19.44,20.98) | 23.44(22.56,24.32) | 21.42(20.63,22.21) |
| April 2004 - March 2005 | 17.77(16.98,18.55) | 20.55(19.7,21.4) | 20.59(19.83,21.35) | 23.96(23.09,24.84) | 21.9(21.12,22.69) |
| April 2005 - March 2006 | 18.72(17.92,19.52) | 21.69(20.82,22.56) | 21.97(21.18,22.75) | 25.59(24.69,26.49) | 23.44(22.63,24.24) |
| April 2006 - March 2007 | 17.48(16.72,18.23) | 20.26(19.43,21.09) | 20.37(19.63,21.11) | 23.82(22.97,24.67) | 21.72(20.96,22.48) |
| April 2007 - March 2008 | 16.26(15.47,17.04) | 18.68(17.84,19.52) | 18.1(17.41,18.8) | 21.05(20.26,21.84) | 18.71(18.03,19.39) |
| April 2008 - March 2009 | 17.78(16.83,18.72) | 20.18(19.19,21.16) | 19.06(18.29,19.82) | 21.99(21.14,22.84) | 19.03(18.34,19.71) |
| April 2009 - March 2010 | 16.25(15.34,17.16) | 18.57(17.62,19.52) | 17.31(16.59,18.04) | 20.17(19.36,20.99) | 17.3(16.65,17.95) |
| April 2010 - March 2011 | 19.85(18.82,20.89) | 22.47(21.4,23.54) | 20.72(19.92,21.53) | 23.91(23.03,24.8) | 20.38(19.69,21.08) |
| April 2011 - March 2012 | 23.57(22.44,24.7) | 26.45(25.29,27.6) | 24.18(23.31,25.05) | 27.75(26.8,28.7) | 23.43(22.69,24.17) |
| April 2012 - March 2013 | 21.14(20.15,22.13) | 24.17(23.14,25.19) | 22.71(21.9,23.51) | 26.45(25.56,27.35) | 22.86(22.14,23.59) |
| April 2013 - March 2014 | 22.8(21.81,23.8) | 26.12(25.09,27.16) | 24.71(23.9,25.52) | 28.78(27.87,29.68) | 25.06(24.32,25.8) |
| April 2014 - March 2015 | 23.82(22.76,24.88) | 27.06(25.96,28.16) | 25.11(24.28,25.95) | 29.09(28.16,30.01) | 25.01(24.27,25.76) |
| April 2015 - March 2016 | 19.92(19.05,20.8) | 22.95(22.03,23.87) | 22.02(21.28,22.76) | 25.73(24.89,26.56) | 22.62(21.93,23.32) |

Appendix 2) Age, sex, and place of residence adjusted incidence rates (95% CI) of Ischemic Heart Disease (per 10000) based on WHO-MONICA in Isfahan, Iran, during April 2001-March 2016

IR: Incidence Rate, CI: confidence Interval,

1: Age, sex and place of residence adjusted incidence rate (Iran population on census 2006 as reference population)

2: Age, sex and place of residence adjusted incidence rate (Iran population on census 2011 as reference population)

3: Age, sex and place of residence adjusted incidence rate (Isfahan province population on census 2006 as reference population)

4: Age, sex and place of residence adjusted incidence rate (Isfahan province population on census 2011 as reference population)

5: Age, sex and place of residence adjusted incidence rate (Isfahan district population during 2001-2016 as reference population)
